# Supplementary material for: Graphene/Reduced Graphene Oxide-Carbon Nanotubes Composite Electrodes: From Capacitive to Battery-Type Behaviour
Source: MDPI journal article supplement (doi:10.3390/nano11051240), 2021-05-08
Supplement: s1 [file s1]

## Supplementary Materials

# Graphene/Reduced Graphene Oxide-Carbon Nanotubes Composite Electrodes: from Capacitive to Battery-type Behaviour

Olena Okhay <sup>1,\*</sup> and Alexander Tkach <sup>2</sup>

<sup>1</sup> TEMA-Center for Mechanical Technology and Automation, Department of Mechanical Engineering, University of Aveiro, 3810-193 Aveiro, Portugal

<sup>2</sup> CICECO-Aveiro Institute of Materials, Department of Materials and Ceramic Engineering, University of Aveiro, 3810-193 Aveiro, Portugal; atkach@ua.pt

\* Correspondence: olena@ua.pt

## Content

|                                                                                                                                            | Page |
|--------------------------------------------------------------------------------------------------------------------------------------------|------|
| Table S1. Published details of capacitive G/rGO-CNT-based single electrodes measured in three-electrode configuration                      | 2    |
| Table S2. Published details of N-doped G/rGO-CNT single electrodes measured in three-electrode configuration                               | 3    |
| Table S3. Published details of single G/rGO-CNT electrodes modified by PPy measured in three-electrode configuration                       | 3    |
| Table S4. Published details of G/rGO-CNT single electrodes modified by PANI measured in three-electrode configuration                      | 3    |
| Table S5. Published details of G/rGO-CNT-based single electrodes prepared with metal catalysts measured in three-electrode configuration   | 4    |
| Table S6. Published details of G/rGO-CNT-based single electrodes modified by MnO <sub>2</sub> measured in three-electrode configuration    | 4    |
| Table S7. Published details of G/rGO-CNT-based single electrodes modified by other metal oxides measured in three-electrode configuration  | 4    |
| Table S8. Published details of G/rGO-CNT-based single electrodes modified by Ni(OH) <sub>2</sub> measured in three-electrode configuration | 5    |
| Glossary                                                                                                                                   | 5    |
| List of References                                                                                                                         | 6    |

**Table S1.** Published details of capacitive G/rGO-CNT single electrodes measured in three-electrode configuration.

| Electrode materials      | Substrate  | Processing details                                                     | Electrolyte                            | Capacitance                                  | Ref. |
|--------------------------|------------|------------------------------------------------------------------------|----------------------------------------|----------------------------------------------|------|
| rGO,CNT,PVDF             | C-cloth    | 80%rGO+10%CNT+10%PVDF,180 °C                                           | Na <sub>2</sub> SO <sub>4</sub>        | 129 F/g, 0.1 A/g                             | [1]  |
| rGO,CNT                  | FS         | VF, hydrozine-gas                                                      | KOH                                    | 265 F/g, 0.1 A/g                             | [2]  |
| rGO,CNT,PDAA,CB,PTFE     | Ni foam    | Urea, KMnO <sub>4</sub> , 80 °C                                        | Na <sub>2</sub> SO <sub>4</sub>        | 80 F/g, 0.2 A/g                              | [3]  |
| rGO,CNT,AB,PTFE          | Ni foam    | H <sub>6</sub> N <sub>2</sub> O, 95°C, KMnO <sub>4</sub>               | Na <sub>2</sub> SO <sub>4</sub>        | 91 F/g, 0.25 A/g                             | [4]  |
| rGO,CNT                  | Ni foam    | dried, 250 °C, pressed                                                 | KOH                                    | 200 F/g, 0.25 A/g                            | [5]  |
| rGO,CNT                  | GCE        | urea                                                                   | KOH                                    | 10 F/g, 0.5 A/g                              | [6]  |
| rGO,CNT                  | Ni foam    | VF, dried, 250 °C, pressed                                             | Na <sub>2</sub> SO <sub>4</sub>        | 151 F/g, 0.5 A/g                             | [7]  |
| rGO,CNT,CB,PTFE          | Ni foam    | chem. oxidation, 200 °C                                                | Na <sub>2</sub> SO <sub>4</sub>        | 202 F/g, 0.5 A/g                             | [8]  |
| rGO,CNT,MC,Naf           | C-paper    | HT, 180 °C, aerogel<br>80%AM+15%MC+5% Naf                              | H <sub>2</sub> SO <sub>4</sub>         | 335 F/g, 0.5 A/g                             | [9]  |
| G,CNT                    | Cu foil    | CNT-G                                                                  | Na <sub>2</sub> SO <sub>4</sub>        | 42 F/g, 1 A/g                                | [10] |
| rGO,CNT                  | GCE        | H <sub>6</sub> N <sub>2</sub> O, 95 °C, in-situ polymerization         | H <sub>2</sub> SO <sub>4</sub>         | 53 F/g, 1 A/g                                | [11] |
| rGO,CNT                  | fiber      | vit. C, 80 °C, inject                                                  | Na <sub>2</sub> SO <sub>4</sub>        | 60 F/g, 1 A/g                                | [12] |
| rGO,CNT                  | st. steel  | aerogel, 800 °C, urea, 70 °C                                           | KOH                                    | 149 F/g, 1 A/g                               | [13] |
| rGO,CNT,pp-AC            | FS         | 600 °C, VF<br>10%rGO+10%CNT+80%pp-AC                                   | KOH                                    | 214 F/g, 1 A/g                               | [14] |
| rGO,CNT,SDBS,PVA,AB,PTFE | Ni foam    | H <sub>6</sub> N <sub>2</sub> O, coating<br>85%AM+10%AB+5%PTFE         | KOH                                    | 375 F/g, 1 A/g                               | [15] |
| rGO,CNT                  | Ni foam    | VF, 300 °C, pressed                                                    | KOH                                    | 194 F/g, 2 A/g                               | [16] |
| rGO,CNT                  | ITO        | LbL, into PEI-rGO/CNT-COOH, 150°C                                      | H <sub>2</sub> SO <sub>4</sub>         | 120 F/g, 1 mV/s                              | [17] |
| rGO,CNT,AB,PTFE          | Ni foam    | 400 °C, 800 °C, KMnO <sub>4</sub>                                      | Na <sub>2</sub> SO <sub>4</sub>        | 35 F/g, 5 mV/s                               | [18] |
| rGO,CNT                  | Gr-paper   | MW, 150°C, EPD                                                         | KCl                                    | 87 F/g, 5 mV/s                               | [19] |
| rGO,CNT                  | Ti foil    | 200 °C                                                                 | Na <sub>2</sub> SO <sub>4</sub>        | 272 F/g, 5 mV/s                              | [20] |
| CNT,Gr                   | Ni foil    | VA CNT on/from HOPG                                                    | KOH                                    | 110 F/g, 10 mV/s                             | [21] |
| GO,CNT, Gr.powder, PVDF  | Gr.-plates | H <sub>6</sub> N <sub>2</sub> O<br>80%AM+10%Gr.powder+10%PVDF          | Na <sub>2</sub> SO <sub>4</sub>        | 150 F/g, 20 mV/s                             | [22] |
| rGO,CNT                  | ITO        | LbL, transfer                                                          | H <sub>2</sub> SO <sub>4</sub>         | 157 F/g, 50 mV/s                             | [23] |
| rGO,CNT                  | Si         | H <sub>6</sub> N <sub>2</sub> O                                        | KOH                                    | 194 F/g, 50 mV/s                             | [24] |
| rGO,CNT,AB,PVDF          | Ti plate   | 100 °C, H <sub>6</sub> N <sub>2</sub> O<br>40%rGO+40%CNT+10%AB+10%PVDF | H <sub>2</sub> SO <sub>4</sub>         | 250 F/g, 50 mV/s                             | [25] |
| rGO,CNT                  | GCE        | 110 °C                                                                 | KOH                                    | 132 F/g, 100 mV/s                            | [26] |
| rGO,CNT                  | FS         | VF, H <sub>6</sub> N <sub>2</sub> O, NH <sub>4</sub> OH                | KOH                                    | 294 F/cm <sup>3</sup> , 5 mV/s               | [27] |
| rGO,CNT                  | fiber      | vit. C, 90 °C                                                          | LiCl                                   | 10.8 F/cm <sup>3</sup> , 10 mV/s             | [28] |
| rGO,CNT                  | fiber      | vit. C, 200 °C                                                         | H <sub>2</sub> SO <sub>4</sub><br>-PVA | 36.7 F/cm <sup>3</sup> , 1 A/cm <sup>3</sup> | [29] |

**Table S2.** Published details of N-doped G/rGO-CNT single electrodes measured in three-electrode configuration.

| Electrode materials | Substrate | Processing details                         | Electrolyte | Capacitance after<br>(before) N doping | Ref. |
|---------------------|-----------|--------------------------------------------|-------------|----------------------------------------|------|
| rGO,CNT,PDA,AB,PTFE | Ni foam   | HT, 180 °C, coating<br>80%AM+10%PVDF+10%AB | KOH         | 176 (-) F/g, 0.5 A/g                   | [30] |
| rGO,CNT,LS          | GCE       | urea, LS, 800 °C                           | KOH         | 246 (10) F/g, 0.5 A/g                  | [6]  |

**Table S3.** Published details of single G/rGO-CNT electrodes modified by PPy measured in three-electrode configuration.

| Electrode materials | Sub-<br>strate | Processing details                                                                                         | Electrolyte                    | Capacitance with<br>(without) PPy        | Ref. |
|---------------------|----------------|------------------------------------------------------------------------------------------------------------|--------------------------------|------------------------------------------|------|
| rGO,CNT,PPy         | fiber          | vit. C, PPy, twisted into springs, coated by                                                               | LiCl                           | 25.9 (10.8) F/cm <sup>3</sup> , 0.01 V/s | [28] |
| rGO,CNT,PPy         | FS             | VF, H <sub>6</sub> N <sub>2</sub> O, (NH <sub>4</sub> ) <sub>2</sub> S <sub>2</sub> O <sub>8</sub> , 95 °C | KCl                            | 211 (-) F/g, 0.2 A/g                     | [31] |
| rGO,CNT,PPy,PTFE    | Gr.-sub        | H <sub>6</sub> N <sub>2</sub> O<br>80%AM+15%CB+5%PTFE                                                      | KCl                            | 361 (-) F/g, 0.2 A/g                     | [32] |
| G,CNT,PPy           | FS             | el.-chem. polymerization<br>0.05%G+0.05%CNT+99.9%PPy                                                       | H <sub>2</sub> SO <sub>4</sub> | 453 (-) F/g, 5 mV/s                      | [33] |

**Table S4.** Published details of G/rGO-CNT single electrodes modified by PANI measured in three-electrode configuration.

| Electrode materials  | Substrate | Processing details                                                | Electrolyte                         | Capacitance with<br>(without) PANI                 | Ref. |
|----------------------|-----------|-------------------------------------------------------------------|-------------------------------------|----------------------------------------------------|------|
| rGO,CNT,PANI         | FS        | VF, 200 °C                                                        | H <sub>2</sub> SO <sub>4</sub>      | 257 (-) F/g, 0.2 A/g                               | [34] |
| rGO,PANI,CNT         | FS        | VF, 250 °C                                                        | H <sub>2</sub> SO <sub>4</sub>      | 638 (-) F/g, 0.5 A/g                               | [35] |
| rGO,CNT,PANI,MC,Naf  | C-paper   | HT, 180 °C, aerogel.<br>80%AM+15%MC+5% Naf                        | H <sub>2</sub> SO <sub>4</sub>      | 987 (335) F/g, 0.5 A/g                             | [9]  |
| rGO,CNT,PANI         | GCE       | H <sub>6</sub> N <sub>2</sub> O, 95 °C                            | H <sub>2</sub> SO <sub>4</sub>      | 359 (53) F/g, 1 A/g                                | [11] |
| rGO,CNT,PANI,CB,PTFE | Ni foam   | H <sub>6</sub> N <sub>2</sub> O, 100 °C<br>75%AM+20%CB+5%PTFE     | KOH                                 | 1035 (-) F/g, 1 mV/s                               | [36] |
| rGO,CNT,PANI         | fiber     | vit. C, 200 °C, PANI onto fiber<br>by cycling voltammetry process | H <sub>2</sub> SO <sub>4</sub> -PVA | 193 (36.7) F/cm <sup>3</sup> , 1 A/cm <sup>3</sup> | [29] |

**Table S5.** Published details of G/rGO-CNT-based single electrodes prepared with metal catalysts measured in three-electrode configuration.

| Electrode materials                                   | Substrate | Processing details                                                                                                                                      | Electrolyte                     | Capacitance in F/g | Ref. |
|-------------------------------------------------------|-----------|---------------------------------------------------------------------------------------------------------------------------------------------------------|---------------------------------|--------------------|------|
| G,CNT,Co,Mo                                           | Gr-paper  | VA G by plasma-assisted method from CNT by CVD with Co/Mo                                                                                               | Na <sub>2</sub> SO <sub>4</sub> | 278, 10 mV/s       | [37] |
| rGO,CNT,Co,Fe/Al <sub>2</sub> O <sub>3</sub> ,CB,PTFE | Ni foam   | GO with Co(NO <sub>3</sub> ) <sub>2</sub> ·6H <sub>2</sub> O and urea, CNT by CVD with Fe/Al <sub>2</sub> O <sub>3</sub> , 750 °C<br>75%AM+20%CB+5%PTFE | KOH                             | 385, 10 mV/s       | [38] |
| G,CNT,Au                                              | Ni foam   | Au on CNT, core-shell G on CNT by powder pressed                                                                                                        | KOH-CMC                         | 373, 1 mV/s        | [39] |

**Table S6.** Published details of G/rGO-CNT-based single electrodes modified by MnO<sub>2</sub> measured in three-electrode configuration.

| Electrode materials                    | Substrate | Processing details                                                         | Electrolyte                     | Capacitance with (without) MnO <sub>2</sub> | Ref. |
|----------------------------------------|-----------|----------------------------------------------------------------------------|---------------------------------|---------------------------------------------|------|
| rGO,CNT,MnO <sub>2</sub> ,PDAA,CB,PTFE | Ni foam   | Urea, KMnO <sub>4</sub> , 80 °C                                            | Na <sub>2</sub> SO <sub>4</sub> | 193 (80) F/g, 0.2 A/g                       | [3]  |
| rGO,CNT,MnO <sub>2</sub> ,AB,PTFE      | Ni foam   | H <sub>6</sub> N <sub>2</sub> O, 95 °C, KMnO <sub>4</sub>                  | Na <sub>2</sub> SO <sub>4</sub> | 126 (91) F/g, 0.25 A/g                      | [4]  |
| rGO,CNT,MnO <sub>2</sub> ,AB,PTFE      | Ni foam   | HT,150 °C, KMnO <sub>4</sub>                                               | Na <sub>2</sub> SO <sub>4</sub> | 336 (-) F/g, 0.5 A/g                        | [40] |
| rGO,CNT,MnO <sub>2</sub> ,AB,PTFE      | Ni foam   | 400 °C, 800 °C, KMnO <sub>4</sub>                                          | Na <sub>2</sub> SO <sub>4</sub> | 133 (35) F/g, 5 mV/s                        | [18] |
| rGO,CNT,MnO <sub>2</sub>               | FS        | VF, H <sub>6</sub> N <sub>2</sub> O, NH <sub>4</sub> OH, KMnO <sub>4</sub> | Na <sub>2</sub> SO <sub>4</sub> | 372 (-) F/g, 10 mV/s                        | [41] |
| rGO,CNT,MnO <sub>2</sub> ,Gr.powder,PV | Gr. paper | H <sub>6</sub> N <sub>2</sub> O, 95 °C, KMnO <sub>4</sub>                  | Na <sub>2</sub> SO <sub>4</sub> | 367 (150) F/g, 20 mV/s                      | [22] |
| G,CNT,MnO <sub>2</sub>                 | Cu foil   | LbL, CVD, 1000 °C<br>thermal decomposition, 410 °C                         | Na <sub>2</sub> SO <sub>4</sub> | 365 (42) F/g, 1 A/g                         | [10] |

**Table S7.** Published details of G/rGO-CNT-based single electrodes modified by other metal oxides measured in three-electrode configuration.

| Electrode materials                                                                 | Substrate | Processing details                                                                                                              | Electrolyte                     | Capacitance, F/g | Ref. |
|-------------------------------------------------------------------------------------|-----------|---------------------------------------------------------------------------------------------------------------------------------|---------------------------------|------------------|------|
| rGO,CNT,CeI <sub>3</sub> ,Co <sub>3</sub> O <sub>4</sub> ,SnO <sub>2</sub> ,AB,PTFE | Ni foam   | NH <sub>4</sub> OH, HCl,<br>CoCl <sub>2</sub> ·6H <sub>2</sub> O, SnCl <sub>2</sub> ·2H <sub>2</sub> O,<br>urea,150 °C, coating | KOH                             | 215, 0.2 A/g     | [42] |
| rGO,CNT,Fe <sub>2</sub> O <sub>3</sub> ,CB,PTFE                                     | Ni foam   | 70%AM+20%AB+10%PTFE<br>75%AM+20%CB+5%PTFE                                                                                       | KOH                             | 657, 1 A/g       | [43] |
| G,CNT,LiMn <sub>2</sub> O <sub>4</sub> ,AB,PTFE                                     | Ni foam   | 85%AM+10%AB+5%PTFE                                                                                                              | Li <sub>2</sub> SO <sub>4</sub> | 676, 0.2 mV/s    | [44] |

**Table S8.** Published details of G/rGO-CNT-based single electrodes modified by Ni(OH)<sub>2</sub> measured in three-electrode configuration.

| Electrode materials                  | Substrate | Processing details                                                                                      | Electrolyte | Capacitance with (without) Ni(OH) <sub>2</sub> | Ref. |
|--------------------------------------|-----------|---------------------------------------------------------------------------------------------------------|-------------|------------------------------------------------|------|
| rGO,CNT,Ni(OH) <sub>2</sub>          | st. steel | GO-CNT aerogel, 800 °C<br>Ni(NO) <sub>3</sub> ×6H <sub>2</sub> O, urea, 70 °C, pressed                  | KOH         | 1208 (149) F/g, 1 A/g                          | [13] |
| rGO,CNT,Ni(OH) <sub>2</sub> ,AB,PTFE | Ni foam   | GO,CNT, urea, NiCl <sub>2</sub> ×6H <sub>2</sub> O,<br>autoclave at 120 °C                              | KOH         | 1320 (-) F/g, 6 A/g                            | [45] |
| G,CNT,Ni(OH) <sub>2</sub>            | Ni foam   | VA CNT on/from HOPG, 1200 °C,<br>G by pyrolysis of FePc, 1000 °C,<br>Ni(OH) <sub>2</sub> coating by ECD | KOH         | 1384 (110) F/g, 5 mV/s                         | [21] |

## Glossary

|                                  |                                         |                                                      |                                                                                                     |
|----------------------------------|-----------------------------------------|------------------------------------------------------|-----------------------------------------------------------------------------------------------------|
| FS                               | freestanding                            | AB                                                   | acetylene black                                                                                     |
| G                                | graphene                                | AC                                                   | active carbon                                                                                       |
| GCE                              | glassy carbon electrode                 | Al <sub>2</sub> O <sub>3</sub>                       | aluminium oxide                                                                                     |
| Gr                               | graphite                                | AM                                                   | active material                                                                                     |
| GO                               | graphene oxide                          | Au                                                   | gold                                                                                                |
| ITO                              | indium tin oxide                        | C-paper                                              | carbon paper                                                                                        |
| HCl                              | hydrochloric acid                       | CB                                                   | carbon black                                                                                        |
| HOPG                             | highly ordered pyrolytic graphite       | C-cloth                                              | carbon cloth                                                                                        |
| HT                               | hydrothermal method                     | Cell.                                                | ethyl cellulose                                                                                     |
| H <sub>6</sub> N <sub>2</sub> O  | hydrazine hydrate or hydrazine solution | chem. oxidation                                      | chemical oxidation                                                                                  |
| H <sub>2</sub> SO <sub>4</sub>   | sulfuric acid                           | CMC                                                  | carboxymethyl cellulose                                                                             |
| HNO <sub>3</sub>                 | nitric acid                             | CNT                                                  | carbon nanotubes                                                                                    |
| KMnO <sub>4</sub>                | potassium permanganate                  | CNT-COOH                                             | carboxylic acid functionalized CNT by concentrated H <sub>2</sub> SO <sub>4</sub> /HNO <sub>3</sub> |
| KOH                              | potassium hydroxide                     | Co                                                   | cobalt                                                                                              |
| KCl                              | potassium chloride                      | Co <sub>3</sub> O <sub>4</sub>                       | cobalt oxide                                                                                        |
| LbL                              | layer-by-layer                          | CoCl <sub>2</sub> ×6H <sub>2</sub> O                 | cobalt chloride hexahydrate                                                                         |
| LiCl                             | lithium chloride                        | Co(NO <sub>3</sub> ) <sub>2</sub> ×6H <sub>2</sub> O | cobaltous nitrate hexahydrate                                                                       |
| LiClO <sub>4</sub>               | lithium perchlorate                     | Cu                                                   | copper                                                                                              |
| LiMn <sub>2</sub> O <sub>4</sub> | lithium mangan dioxide                  | CVD                                                  | chemical vapor deposition                                                                           |
| Li <sub>2</sub> SO <sub>4</sub>  | lithium sulfate                         | ECD                                                  | electrochemical deposition                                                                          |
| LS                               | lignosulfonate                          | EPD                                                  | electrophoretic deposition                                                                          |
| MC                               | mesoporous carbon                       | Fe                                                   | iron                                                                                                |
|                                  |                                         | FePc                                                 | iron phthalocyanines                                                                                |

|                                      |                                                                                                        |                                                                                                             |                                                                                                                      |
|--------------------------------------|--------------------------------------------------------------------------------------------------------|-------------------------------------------------------------------------------------------------------------|----------------------------------------------------------------------------------------------------------------------|
| <i>pp</i> -AC                        | porous AC fabricated by pyrolysis, pre-carbonization, and alkali activation of biomass of pomelo peels | MnO <sub>2</sub><br>Mo<br>MW                                                                                | manganese dioxide<br><br>microwave                                                                                   |
| PPy                                  | polypyrrole                                                                                            | Na <sub>2</sub> SO <sub>4</sub>                                                                             | sodium sulfate                                                                                                       |
| PTFE                                 | polytetrafluoroethylene                                                                                | Naf                                                                                                         | Nafion                                                                                                               |
| PVA                                  | polyvinyl alcohol                                                                                      | (NH <sub>4</sub> ) <sub>2</sub> S <sub>2</sub> O <sub>8</sub>                                               | ammonium persulfate                                                                                                  |
| PVDF                                 | polyvinylidene fluoride                                                                                | NH <sub>4</sub> OH                                                                                          | ammonia hydroxide or ammonia solution                                                                                |
| rGO                                  | reduced graphene oxide                                                                                 | Ni<br>NiCl <sub>2</sub> ×6H <sub>2</sub> O<br>Ni(NO) <sub>3</sub> ×6H <sub>2</sub> O<br>Ni(OH) <sub>2</sub> | nickel<br>nickel chloride hexahydrate<br>nickel nitrate hexahydrate<br>nickel hydroxide                              |
| Si                                   | silicon                                                                                                |                                                                                                             |                                                                                                                      |
| SnO <sub>2</sub>                     | tin oxide                                                                                              | PANI                                                                                                        | polyaniline                                                                                                          |
| SnCl <sub>2</sub> ×2H <sub>2</sub> O |                                                                                                        | PDA                                                                                                         | polydopamine                                                                                                         |
| st. steel                            | stainless steel                                                                                        | PDAA                                                                                                        | poly(1,5-diaminoanthraquinone)                                                                                       |
| Ti                                   | titanium                                                                                               | PEI-rGO                                                                                                     | reduced GO and poly(ethyleneimine) solution after removing by centrifugation of excess polymer and hydrazine hydrate |
| VA                                   | vertically aligned                                                                                     |                                                                                                             |                                                                                                                      |
| VF                                   | vacuum filtration                                                                                      |                                                                                                             |                                                                                                                      |
| vit. C                               | vitamin C                                                                                              |                                                                                                             |                                                                                                                      |

## References

- Okhay, O.; Tkach, A.; Gallo, M.J.H.; Otero-Irurueta, G.; Mikhalev, S.; Staiti, P.; Lufrano, F. Energy storage of supercapacitor electrodes on carbon cloth enhanced by graphene oxide aerogel reducing conditions. *J. Energy Storage* **2020**, *32*, 101839. <http://dx.doi.org/10.1016/j.est.2020.101839>.
- Lu, X.; Dou, H.; Gao, B.; Yuan, C.; Yang, S.; Hao, L.; Shen, L.; Zhang, X. A flexible graphene/multiwalled carbon nanotube film as a high performance electrode material for supercapacitors. *Electrochim. Acta* **2011**, *56*, 5115–5121. <http://dx.doi.org/10.1016/j.electacta.2011.03.066>.
- Lei, Z.; Shi, S.; Lu, L. Incorporation of MnO<sub>2</sub>-coated carbon nanotubes between graphene sheets as supercapacitor electrode. *ACS Appl. Mater. Interfaces* **2012**, *4*, 1058–1064. <http://dx.doi.org/10.1021/am2016848>.
- Deng, L.; Hao, Z.; Wang, J.; Zhu, G.; Kang, L.; Liu, Z.-H.; Yang, Z.; Wang, Z. Preparation and capacitance of graphene/multiwall carbon nanotubes/MnO<sub>2</sub> hybrid material for high-performance asymmetrical electrochemical capacitor. *Electrochim. Acta* **2013**, *89*, 191–198. <http://dx.doi.org/10.1016/j.electacta.2012.10.106>.
- Kumar, A.; Kumar, N.; Sharma, Y.; Leu, J.; Tseng, T.Y. Synthesis of free-standing flexible rGO/MWCNT films for symmetric supercapacitor application. *Nanoscale Res. Lett.* **2019**, *14*, 266. <http://dx.doi.org/10.1186/s11671-019-3100-1>.
- Lin, T.T.; Lai, W.H.; Lü, Q.F.; Yu, Y. Porous nitrogen-doped graphene/carbon nanotubes composite with an enhanced supercapacitor performance. *Electrochim. Acta* **2015**, *178*, 517–524. <http://dx.doi.org/10.1016/j.electacta.2015.08.048>.
- Huang, Z.D.; Zhang, B.; Liang, R.; Zheng, Q.B.; Oh, S.W.; Lin, X.Y.; Yousefi, N.; Kim, J.K. Effects of reduction process and carbon nanotube content on the supercapacitive performance of flexible graphene oxide papers. *Carbon* **2012**, *50*, 4239–4251. <http://dx.doi.org/10.1016/j.carbon.2012.05.006>.
- Ding, B.; Guo, D.; Wang, Y.; Wu, X.; Fan, Z. Functionalized graphene nanosheets decorated on carbon nanotubes networks for high performance supercapacitors. *J. Power Sources* **2018**, *398*, 113–119. <http://dx.doi.org/10.1016/j.jpowsour.2018.07.063>.
- Tran, V.C.; Nguyen, V.H.; Nguyen, T.T.; Lee, J.H.; Huynh, D.C.; Shim, J.J. Polyaniline and multi-walled carbon nanotube-intercalated graphene aerogel and its electrochemical properties. *Synth. Met.* **2016**, *215*, 150–157. <http://dx.doi.org/10.1016/j.synthmet.2016.02.017>.
- Bi, T.; Fang, H.; Jiang, J.; He, X.X.; Zhen, X.; Yang, H.; Wei, Z.; Jia, Z. Enhance supercapacitive performance of MnO<sub>2</sub>/3D carbon nanotubes graphene as a binder-free electrode. *J. Alloys Compd.* **2019**, *787*, 759–766. <http://dx.doi.org/10.1016/j.jallcom.2019.02.117>.

11. Huang, Y.; Zhou, J.; Gao, N.; Yin, Z.; Zhou, H.; Yang, X.; Kuang, Y. Synthesis of 3D reduced graphene oxide/unzipped carbon nanotubes/polyaniline composite for high-performance supercapacitors. *Electrochim. Acta* **2018**, *269*, 649–656. <http://dx.doi.org/10.1016/j.electacta.2018.03.071>.
12. Jiang, N.; Huang, F.; Xia, W.; Wei, J.; Zhou, L.; Huo, Z.; Pang, Q. Facile fabrication of rGO/CNT hybrid fibers for high performance flexible supercapacitors. *J. Mater. Sci.: Mater. Electron.* **2017**, *28*, 12147–12157. <http://dx.doi.org/10.1007/s10854-017-7029-9>.
13. Fan, W.; Shi, Y.; Gao, W.; Sun, Z.; Liu, T. Graphene-carbon nanotube aerogel with a scroll-interconnected-sheet structure as an advanced framework for a high-performance asymmetric supercapacitor electrode. *ACS Appl. Nano Mater.* **2018**, *1*, 4435–4441. <http://dx.doi.org/10.1021/acsanm.8b00605>.
14. Wu, K.; Fu, J.; Zhang, X.; Peng, X.; Gao, B.; Chu, P.K. Three-dimensional flexible carbon electrode for symmetrical supercapacitors. *Mater. Lett.* **2016**, *185*, 193–196. <http://dx.doi.org/10.1016/j.matlet.2016.08.135>.
15. Zhou, Y.; Hu, X.C.; Guo, S.; Yu, C.; Zhong, S.; Liu, X. Multi-functional graphene/carbon nanotube aerogels for its applications in supercapacitor and direct methanol fuel cell. *Electrochim. Acta* **2018**, *264*, 12–19. <http://dx.doi.org/10.1016/j.electacta.2018.01.009>.
16. Yang, Z.G.; Liu, N.N.; Dong, S.; Tian, F.S.; Gao, Y.P.; Hou, Z.Q. Supercapacitors based on free-standing reduced graphene oxides/carbon nanotubes hybrid films. *SN Appl. Sci.* **2019**, *1*, 47. <http://dx.doi.org/10.1007/s42452-018-0059-y>.
17. Yu, D.; Dai, L. Self-assembled graphene/carbon nanotube hybrid films for supercapacitors. *J. Phys. Chem. Lett.* **2010**, *1*, 467–470. <http://dx.doi.org/10.1021/jz9003137>.
18. Liu, Y.; He, D.; Duan, J.; Wang, Y.; Li, S. Synthesis of MnO<sub>2</sub>/graphene/carbon nanotube nanostructured ternary composite for supercapacitor electrodes with high rate capability. *Mater. Chem. Phys.* **2014**, *147*, 141–146. <http://dx.doi.org/10.1016/j.matchemphys.2014.04.020>.
19. Lu, T.; Pan, L.; Li, H.; Nie, C.; Zhu, M.; Sun, Z. Reduced graphene oxide-carbon nanotubes composite films by electrophoretic deposition method for supercapacitors. *J. Electroanal. Chem.* **2011**, *661*, 270–273. <http://dx.doi.org/10.1016/j.jelechem.2011.07.042>.
20. Cui, X.; Lv, R.; Sagar, R.U.R.; Liu, C.; Zhang, Z. Reduced graphene oxide/carbon nanotube hybrid film as high performance negative electrode for supercapacitor. *Electrochim. Acta* **2015**, *169*, 342–350. <http://dx.doi.org/10.1016/j.electacta.2015.04.074>.
21. Du, F.; Yu, D.; Dai, L.; Ganguli, S.; Varshney, V.; Roy, A.K. Preparation of tunable 3D pillared carbon nanotube-graphene networks for high-performance capacitance. *Chem. Mater.* **2011**, *23*, 4810–4816. <http://dx.doi.org/10.1021/cm2021214>.
22. Ramezani, M.; Fathi, M.; Mahboubi, F. Facile synthesis of ternary MnO<sub>2</sub>/graphene nanosheets/carbon nanotubes composites with high rate capability for supercapacitor applications. *Electrochim. Acta* **2015**, *174*, 345–355. <http://dx.doi.org/10.1016/j.electacta.2015.05.155>.
23. Byon, H.R.; Lee, S.W.; Chen, S.; Hammond, P.T.; Shao-Horn, Y. Thin films of carbon nanotubes and chemically reduced graphenes for electrochemical micro-capacitors. *Carbon* **2011**, *49*, 457–467. <http://dx.doi.org/10.1016/j.carbon.2010.09.042>.
24. Dong, X.; Xing, G.; Chan-Park, M.B.; Shi, W.; Xiao, N.; Wang, J.; Yan, Q.; Sum, T.C.; Huang, W.; Chen, P. The formation of a carbon nanotube-graphene oxide core-shell structure and its possible applications. *Carbon* **2011**, *49*, 5071–5078. <http://dx.doi.org/10.1016/j.carbon.2011.07.025>.
25. Zeng, F.; Kuang, Y.; Zhang, N.; Huang, Z.; Pan, Y.; Hou, Z.; Zhou, H.; Yan, C.; Schmidt, O.G. Multilayer super-short carbon nanotube/reduced graphene oxide architecture for enhanced supercapacitor properties. *J. Power Sources* **2014**, *247*, 396–401. <http://dx.doi.org/10.1016/j.jpowsour.2013.08.122>.
26. Lee, B.R.; Chang, D.W. Graphene/multi-walled carbon nanotubes hybrid materials for supercapacitors. *Clean Technol.* **2015**, *21*, 62–67. <http://dx.doi.org/10.7464/ksct.2015.21.1.062>.
27. Jiang, L.; Sheng, L.; Long, C.; Fan, Z. Densely packed graphene nanomesh-carbon nanotube hybrid film for ultra-high volumetric performance supercapacitors. *Nano Energy* **2015**, *11*, 471–480. <http://dx.doi.org/10.1016/j.nanoen.2014.11.007>.
28. Wang, S.; Liu, N.; Su, J.; Li, L.; Long, F.; Zou, Z.; Jiang, X.; Gao, Y. Highly stretchable and self-healable supercapacitor with reduced graphene oxide based fiber springs. *ACS Nano* **2017**, *11*, 2066–2074. <http://dx.doi.org/10.1021/acs.nano.6b08262>.
29. Liu, D.; Du, P.; Wei, W.; Wang, H.; Wang, Q.; Liu, P. Skeleton/skin structured (RGO/CNTs)/PANI composite fiber electrodes with excellent mechanical and electrochemical performance for all solid-state symmetric supercapacitors. *J. Colloid. Interface Sci.* **2018**, *513*, 295–303. <http://dx.doi.org/10.1016/j.jcis.2017.11.027>.
30. Zeng, R.; Deng, H.; Xiao, Y.; Huang, J.; Yuan, K.; Chen, Y. Cross-linked graphene/carbon nanotube networks with polydopamine “glue” for flexible supercapacitors. *Compos. Commun.* **2018**, *10*, 73–80. <http://dx.doi.org/10.1016/j.coco.2018.07.002>.
31. Lu, X.; Dou, H.; Yuan, C.; Yang, S.; Hao, L.; Zhang, F.; Shen, L.; Zhang, L.; Zhang, X. Polypyrrole/carbon nanotube nanocomposite enhanced the electrochemical capacitance of flexible graphene film for supercapacitors. *J. Power Sources* **2012**, *197*, 319–324. <http://dx.doi.org/10.1016/j.jpowsour.2011.08.112>.
32. Lu, X.; Zhang, F.; Dou, H.; Yuan, C.; Yang, S.; Hao, L.; Shen, L.; Zhang, L.; Zhang, X. Preparation and electrochemical capacitance of hierarchical graphene/polypyrrole/carbon nanotube ternary composites. *Electrochim. Acta* **2012**, *69*, 160–166. <http://dx.doi.org/10.1016/j.electacta.2012.02.107>.
33. Aphale, A.; Maisuria, K.; Mahapatra, M.K.; Santiago, A.; Singh, P.; Patra, P. Hybrid electrodes by in-situ integration of graphene and carbon-nanotubes in polypyrrole for supercapacitors. *Sci. Rep.* **2015**, *5*, 14445. <http://dx.doi.org/10.1038/srep14445>.
34. Huang, Z.D.; Liang, R.; Zhang, B.; He, Y.B.; Kim, J.K. Evolution of flexible 3D graphene oxide/carbon nanotube/polyaniline composite papers and their supercapacitive performance. *Compos. Sci. Technol.* **2013**, *88*, 126–133. <http://dx.doi.org/10.1016/j.compscitech.2013.08.038>.

35. Liu, P.; Yan, J.; Gao, X.; Huang, Y.; Zhang, Y. Construction of layer-by-layer sandwiched graphene/polyaniline nanorods/carbon nanotubes heterostructures for high performance supercapacitors. *Electrochim. Acta* **2018**, *272*, 77–87. <http://dx.doi.org/10.1016/j.electacta.2018.03.198>.
36. Yan, J.; Wei, T.; Fan, Z.; Qian, W.; Zhang, M.; Shen, X.; Wei, F. Preparation of graphene nanosheet/carbon nanotube/polyaniline composite as electrode material for supercapacitors. *J. Power Sources* **2010**, *195*, 3041–3045. <http://dx.doi.org/10.1016/j.jpowsour.2009.11.028>.
37. Seo, D.H.; Yick, S.; Han, Z.J.; Fang, J.H.; Ostrikov, K. Synergistic fusion of vertical graphene nanosheets and carbon nanotubes for high-performance supercapacitor electrodes. *Chem. Sus. Chem.* **2014**, *7*, 2317–2324. <http://dx.doi.org/10.1002/cssc.201402045>.
38. Fan, Z.; Yan, J.; Zhi, L.; Zhang, Q.; Wei, T.; Feng, J.; Zhang, M.; Qian, W.; Wei, F. A three-dimensional carbon nanotube/graphene sandwich and its application as electrode in supercapacitors. *Adv. Mater.* **2010**, *22*, 3723–3728. <http://dx.doi.org/10.1002/adma.201001029>.
39. Li, K.; Li, H.; Li, M.; Li, C.; Su, L.; Qian, L.; Yang, B. Carbon-nanotube@graphene core-shell nanostructures as active material in flexible symmetrical supercapacitors. *Compos. Sci. Technol.* **2019**, *175*, 92–99. <http://dx.doi.org/10.1016/j.compscitech.2019.03.013>.
40. Li, W.; Xu, H.; Cui, M.; Zhao, J.; Liu, F.; Liu, T. Synthesis of sulfonated graphene/carbon nanotubes/manganese dioxide composite with high electrochemical properties. *Ionics* **2019**, *25*, 999–1006. <http://dx.doi.org/10.1007/s11581-018-2767-0>.
41. Cheng, Y.; Lu, S.; Zhang, H.; Varanasi, C.V.; Liu, J. Synergistic effects from graphene and carbon nanotubes enable flexible and robust electrodes for high-performance supercapacitors. *Nano Lett.* **2012**, *12*, 4206–4211. <http://dx.doi.org/10.1021/nl301804c>.
42. Ramesh, S.; Khandelwal, S.; Rhee, K.Y.; Hui, D. Synergistic effect of reduced graphene oxide, CNT and metal oxides on cellulose matrix for supercapacitor applications. *Comp. B: Eng.* **2018**, *138*, 45–54. <http://dx.doi.org/10.1016/j.compositesb.2017.11.024>.
43. Tian, Y.; Hu, X.; Wang, Y.; Li, C.; Wu, X. Fe<sub>2</sub>O<sub>3</sub> nanoparticles decorated on graphene-carbon nanotubes conductive networks for boosting the energy density of all-solid-state asymmetric supercapacitor. *ACS Sustainable Chem. Eng.* **2019**, *7*, 9211–9219. <http://dx.doi.org/10.1021/acssuschemeng.8b06857>.
44. Chen, L.; Li, D.; Zheng, X.; Chen, L.; Zhang, Y.; Liang, Z.; Feng, J.; Si, P.; Lou, J.; Ci, L. Integrated nanocomposite of LiMn<sub>2</sub>O<sub>4</sub>/graphene/carbon nanotubes with pseudocapacitive properties as superior cathode for aqueous hybrid capacitors. *J. Electroanal. Chem.* **2019**, *842*, 74–81. <http://dx.doi.org/10.1016/j.jelechem.2019.04.056>.
45. Chen, X.; Chen, X.; Zhang, F.; Yang, Z.; Huang, S. One-pot hydrothermal synthesis of reduced graphene oxide/carbon nanotube/ $\alpha$ -Ni(OH)<sub>2</sub> composites for high performance electrochemical supercapacitor. *J. Power Sources* **2013**, *243*, 555–561. <http://dx.doi.org/10.1016/j.jpowsour.2013.04.076>.
